# Supplementary material for: Redox imbalance links COVID-19 and myalgic encephalomyelitis/chronic fatigue syndrome
Source: PubMed Central journal article supplement — Proc Natl Acad Sci U S A. 2021 Aug 16;118(34):e2024358118. doi: 10.1073/pnas.2024358118 (PMC8403932; doi:10.1073/pnas.2024358118), 2021-08-16
Supplement: pnas.2024358118.sapp.pdf [file pnas.2024358118.sapp.pdf]

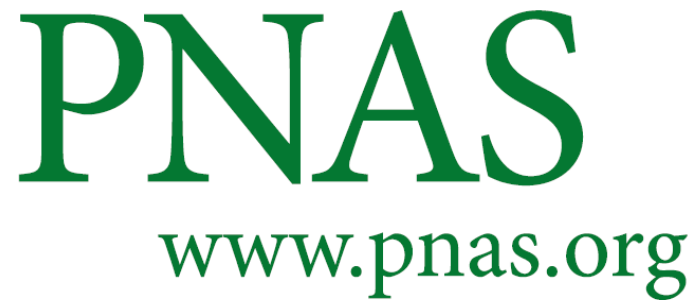

**Supplementary Information for**

Redox imbalance links COVID-19 and myalgic encephalomyelitis/chronic fatigue syndrome

Bindu D. Paul<sup>a,b,c,1</sup>, Marian D. Lemle<sup>d</sup>, Anthony L. Komaroff<sup>e</sup>, and Solomon H. Snyder<sup>a,b,c,1</sup>

<sup>1</sup>Bindu D. Paul, <sup>1</sup>Solomon H. Snyder;

Email: [bpaul8@jhmi.edu](mailto:bpaul8@jhmi.edu);

[ssnyder@jhmi.edu](mailto:ssnyder@jhmi.edu)

**This PDF file includes:**

Figure S1

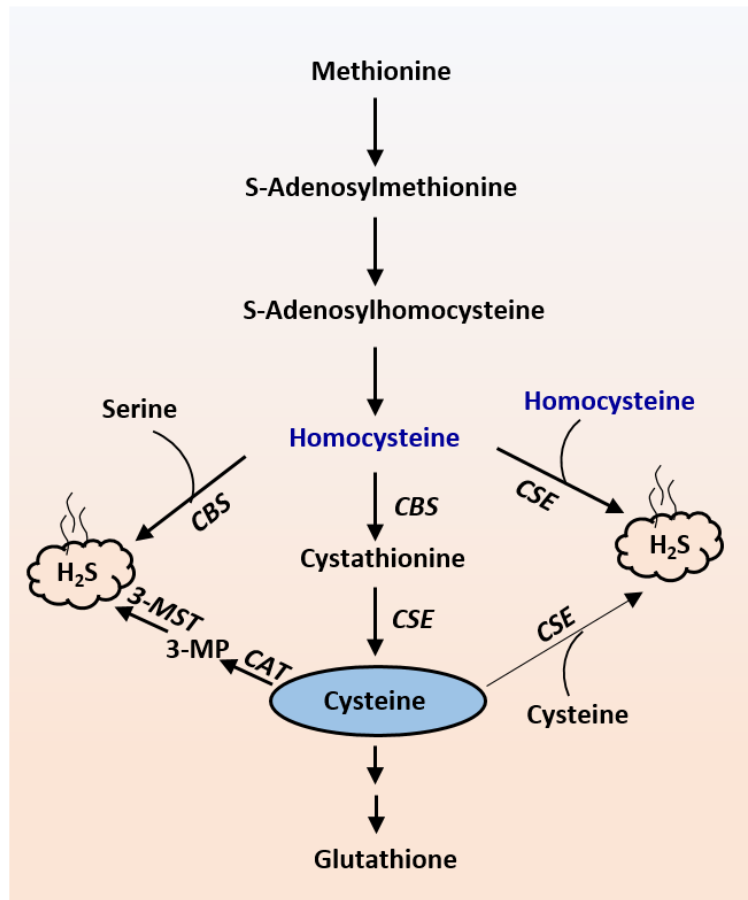

**Fig. S1.** The reverse transsulfuration pathway. Homocysteine, generated from dietary methionine, is condensed with serine to generate cystathionine by cystathionine  $\beta$ -synthase (CBS). Cystathionine  $\gamma$ -lyase (CSE) acts on cystathionine to produce cysteine. Cysteine can either be utilized to synthesize glutathione and other sulfur containing molecules or used as a substrate to generate hydrogen sulfide (H<sub>2</sub>S). Both homocysteine and cysteine may be utilized to produce H<sub>2</sub>S. While CSE may produce H<sub>2</sub>S from either cysteine or homocysteine, CBS generates H<sub>2</sub>S using a combination of cysteine and homocysteine. 3-mercaptopyruvate sulfur transferase (3-MST), in conjunction with cysteine amino transferase (CAT), a third enzyme, also produces H<sub>2</sub>S using 3-mercaptopyruvate (3-MP) as a substrate.
